1 **Determinants of male involvement in antenatal care at Palabek Refugee Settlement, Lamwo district,**  
2 **Northern Uganda:**

3 **Authors:** Auma Irene<sup>1</sup> \*, Nabaweesi Dinah<sup>2</sup>, Orech Sam<sup>3</sup>, John Bosco Alege<sup>1</sup>, Allan Komakech<sup>1,4</sup>

4 **Institutional affiliations**

5 <sup>1</sup>Clarke International University, Kampala, Uganda.

6 <sup>2</sup>Uganda Management Institute, Kampala, Uganda.

7 <sup>3</sup>Lira University, Lira, Uganda

8 <sup>4</sup>Ministry of Health, Kampala, Uganda.

9

10 **\* Corresponding author:**

11 Auma Irene, DCN, BscPH, MPH

12 Clarke International University, Kampala, Uganda

13 Tel: +256785553710,

14 Email: aumireen0@gmail.com

15 **Abstract**

16 **Background:** In 2014, Uganda launched the National Male Involvement Strategy in Maternal and Child  
17 Health. In 2020, the District Health Management Information System report for Lamwo district, where  
18 Palabek Refugee Settlement is located, indicated a 10% male involvement in antenatal care (ANC). We  
19 investigated determinants of male involvement in ANC in Palabek Refugee Settlement to inform programs  
20 on improvement of male involvement in ANC in a refugee setting.

21 **Methodology:** We conducted a community-based cross-sectional analytical study among a proportionate  
22 sample of mothers in Palabek Refugee Settlement from October-December 2021. Using a standardized  
23 questionnaire, we collected information on demographics and the constructs of the socio-ecological  
24 model where consent was given. We summarized data in tables and figures. We used Pearson chi-square  
25 test to determine significance of independent variables at bivariate level. A multivariable logistic  
26 regression model was run for all variables found significant at bivariate analysis to determine association  
27 between the different independent variables and male involvement in ANC.

28 **Results:** We interviewed 423 mothers. The mean age of their male partners was 31 years, SD 7. Eighty-  
29 one percent (343/423) of male partners had formal education, with 13% (55/423) having a source of  
30 income and 61% (257/423) having access to ANC information during their pregnancy. The level of male  
31 involvement in ANC in Palabek Refugee Settlement was 39% (164/423). Male involvement in ANC was  
32 positively associated with access to information on ANC (AOR 3.0; 95%CI: 1.7-5.4) and frequent couple  
33 discussion on ANC (AOR 10.1; 95%CI: 5.6-18.0). However, it was negatively associated with distance  $\geq 3$ km  
34 to the health facility (AOR 0.6 ;95%CI: 0.4-1.0).

35 **Conclusions:** Approximately one in three male partners in Palabek Refugee Settlement were involved in  
36 ANC. Male partners who had access to information during ANC and those who had frequent discussions  
37 were more likely to get involved in ANC. Men who lived  $\geq 3$  kilometers from the health facility were less  
38 likely to be involved in ANC. We recommend intensified awareness creation on importance of male  
39 involvement in ANC and implementation of integrated community outreaches to reduce distance to the  
40 health facility.

41 **Key words:** Male involvement, antenatal care, Palabek Refugee Settlement, Northern Uganda.

42 **Word count:** 340 Abstract, 4201 main text

## 43 **Introduction**

44 Globally male involvement in maternal and child health remains low in both developed and developing  
45 countries (1).Some studies have indicated that few men get involved in antenatal care activities with less  
46 involvement being realized in the developing nations(2–4).

47 In low and middle-income countries male involvement in different aspects of maternal care is limited. An  
48 analysis of Demographic and Health Surveys across eight African countries indicated that less than half of  
49 all males were involved in antenatal care (ANC) with an average of 45.7% of men attending at least one  
50 ANC visit together with their partners (5).

51 A number of studies have suggested that male involvement in ANC is associated with benefits such as  
52 increased likelihood of adherence to HIV advice during pregnancy hence reduction of Mother to Child  
53 Transmission (MTCT) rates of HIV, improved utilization of maternal health services and reduced delays in  
54 the decision to seek health care(6–10).Despite its benefits, studies have also indicated that male  
55 involvement in ANC is affected by different individual, relational, institutional and societal related factors  
56 (11–15).

57 In Uganda, although the government launched the national male involvement strategy and guidelines in  
58 2014, male involvement in ANC remains low. In a study conducted in Ibanda district in 2016, 50% of the  
59 women attending ANC did not have an attendant and the few who had them rarely had attendants as  
60 their husbands (16). In another study conducted in Uganda, male involvement in antenatal care was found  
61 to be only 6%(17).

62 The 2020 Lamwo district Health Management Information system (HMIS) report indicated that only 10%  
63 of women from Palabek refugee settlement who attended antenatal care from July 2019 to June 2020  
64 were accompanied by their partners for at least one antenatal care visit and less than 5% were

65 accompanied by their spouses for four or more visits(18). However, male involvement in a refugee setting  
66 such as Palabek refugee settlement, which historically has family issues, is unknown.

67 The objectives of our study were to determine the factors associated with male involvement at Palabek  
68 refugee settlement to help inform programs aimed at improving male involvement in such a setting.

## 69 **Methods**

### 70 **Study design and study setting**

71 This was a community based analytical cross-sectional study which was conducted in Palabek refugee  
72 settlement in Lamwo District. In 2021 when the study was conducted,this settlement was made up of 9  
73 zones that is Zone 1, Zone 2, Zone 3, Zone 4, Zone 5A, Zone 5B, Zone 6, Zone 7, and Zone 8.The  
74 settlement had a population of approximately 59,462 refugees, primarily from South Sudan(19). The  
75 settlement had three health facilities; Paluda Health Center III, Awich Health Center II and Akworo Health  
76 Center II. Other facilities within the host community where refugees seek health services are: Apyeta  
77 Health Center II and Palabek Ogili Health Center III. All these health facilities offer routine ANC services  
78 on week days with only emergency cases handled over the weekends.

### 79 **Study population.**

80 The study involved all females aged  $\geq 18$  years who were either six months and above expectant or gave  
81 birth in the previous one year before the study (October 2020 to October 2021).The team chose to  
82 interview female partners because we thought it would be difficult for the men to admit incase they were  
83 not involved in their partne's ANC. In otherwords we thought the men would be baised and would not  
84 give the most accurate information. However,we thought the women would give us a more honest views  
85 on this.

86

87

88

89

#### 90 **Sample size determination**

91 The sample size was 384 calculated using the Kish Leslie formula based on the most conservative 50%  
92 estimated prevalence and a level of significance 5%. We further inflated this figure by 10% to account for  
93 non-response and recording errors during the study.

#### 94 **Sampling procedure**

95 We used probability proportionate sampling to calculate the numbers required for each zone. Data from  
96 Lamwo district HMIS report (2020) and data from village health teams' registers was used to ascertain the  
97 number of pregnancies ( $\geq 6$  months) and households with children  $\leq 12$  months. The second step involved  
98 conducting a convenience sampling of households with either an expectant mother or child below 1 year.  
99 To determine the direction of the zone where the interviews started, the research assistant stood at the  
100 center of the zone and threw a pen to the ground. The direction pointed by the lid became the starting  
101 point for interviews. Every expectant mother or mother who had a child below one year and gave consent  
102 was interviewed. When households in a particular direction got exhausted, the same process was  
103 repeated and the direction pointed by the pen lid was again used to determine the direction to be taken.  
104 This went on until the sample size was achieved.

#### 105 **Data collection methods and tools**

106 We conducted researcher-administered interviews using a standardized questionnaire with the help  
107 of six (6) research assistants. The first part captured information on different variables that affect male  
108 participation in ANC according to the constructs of the socio-ecological model. The second part assessed  
109 the level of men's involvement in ANC.

#### 110 **Study variables**

111 The dependent variable was male involvement in antenatal care which was measured on a scale of 1-6  
112 points with equal weights in the score adopted from Byamugisha et al index(20). The activities assessed

113 using this scale included; whether the man makes joint plans with partner during pregnancy, whether the  
114 man attends ANC with partner, whether the man provides funding for ANC activities, whether the man  
115 helps in performing household chores, whether the man discusses with partner on issues occurring during  
116 ANC and whether the man discusses with partner's healthcare provider on partner's pregnancy. Each  
117 activity was given a score of one (1) if performed and zero (0) if not performed. A total score of 0-3 was  
118 considered non-involvement in ANC, while a score of 4-6 was considered as male involvement in ANC.  
119 The independent variables included the individual, relational, community and societal predictors of  
120 male participation in ANC.

### 121 **Data analysis**

122 We analyzed data using Statistical Package for the Social Sciences (SPSS) version 22. At univariate level  
123 data was presented in frequencies and percentages. Age was expressed as a mean with its respective  
124 standard deviation. At bivariate level, associations between the dependent variable (male involvement in  
125 ANC) and the independent variables were determined using a Chi-Square test. The computed Chi-Square  
126 was compared to the critical value 0.05 level of significance at a 95% confidence interval. All the variables  
127 that were found to be significant ( $p < 0.05$ ) at the bivariate level were included in a binomial logistic  
128 regression model where crude odds ratios (ORs) and adjusted odds ratio and the 95% confidence intervals  
129 for each variable were calculated. The level of significance was equally set at  $P < 0.05$ .

### 130 **Ethics approval**

131 Approval to carry out the study was obtained from the Clarke International University Research Ethical  
132 Committee No.1.0, 2021-10-05. Permission to collect data was sought from office of the Prime Minister  
133 (Palabek refugee desk). Informed written consent in the local language was sought from respondents.  
134 They were informed that their participation was voluntary, and their refusal would not result in any  
135 negative consequences. To protect the confidentiality of the respondents, each was assigned a unique  
136 identifier which was used instead of their names.

137 **Results**

138 **Individual characteristics of male partners during a study to assess male involvement in ANC, Palabek**

139 **Refugee Settlement, Lamwo district, Uganda, October-December, 2021**

140 We interviewed a total of 423 females during this study. The mean age of the male partners was 31 years,  
141 SD 7. One hundred ninety-eight (47%) male partners were in the age group 28-37 years; majority (323,  
142 76%) were married/cohabiting with their female partners. Three hundred forty-three (81%) had no formal  
143 education and most (257; 61%) had access to ANC information (Table 1)

144 **Table 1: Individual characteristics of male partners**

| <b>Variable</b>                                              | <b>Frequency, n (%)</b> |
|--------------------------------------------------------------|-------------------------|
| <b>Male partner's age</b>                                    |                         |
| 18-27                                                        | 165 (39)                |
| 28-37                                                        | 198 (47)                |
| 38-47                                                        | 45 (11)                 |
| >48                                                          | 15 (3)                  |
| <b>Marital status</b>                                        |                         |
| Married/cohabiting                                           | 323 (76)                |
| Unmarried                                                    | 100 (24)                |
| <b>Level of education</b>                                    |                         |
| Formal education                                             | 80 (19)                 |
| No formal education                                          | 343 (81)                |
| <b>Number of children with partner</b>                       |                         |
| 0-2                                                          | 194 (46)                |
| 3-5                                                          | 171 (40)                |
| >6                                                           | 58 (14)                 |
| <b>Source of income</b>                                      |                         |
| Yes                                                          | 55 (13)                 |
| No                                                           | 368 (87)                |
| <b>Accessed ANC information during most recent pregnancy</b> |                         |
| Yes                                                          | 257 (61)                |
| No                                                           | 166 (39)                |

145

146

147

148 **Level of male involvement in ANC, Palabek Refugee Settlement, Uganda, October-December, 2021.**

149 Of the 423 female respondents interviewed, 164 (39%) of their male partners were found to have been  
150 involved in ANC (Figure 1).

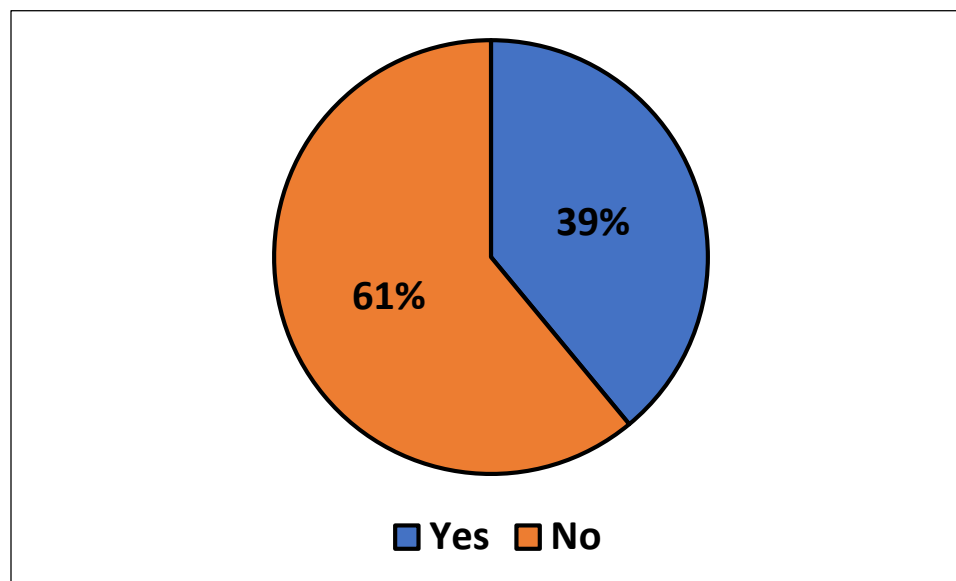

151

152 **Figure 1: Male involvement in ANC, Palabek Refugee Settlement, Uganda, October-December, 2021**

153 **Relational, institutional and societal characteristics of male partners during a study to assess**  
154 **determinants of male involvement in ANC, Palabek Refugee Settlement, Uganda, November 2021**

155 Study findings indicated that 231 (55%) of respondents had frequent discussions of at least three times  
156 each week, 289 (68%) lived with their partners, 256(61%) lived with other family members while 234(55%)  
157 reported that peer influence affected male partner's involvement in ANC (Table 2).

158 Among the institutional characteristics, 315 (75%) of respondents thought that long waiting hours at the  
159 health facility during ANC clinics affects male involvement in ANC ,217 (51%) thought fear of HIV testing  
160 affects male involvement, 56 (13%) thought health worker's attitude affects male involvement in ANC,  
161 while 220 (52%) of respondents reported that distance from their partner's home to health facility was  
162  $\geq 3$ km



163 In regard to societal characteristics, 239 (57%) of respondents reported that cultural norms affect male  
 164 involvement in ANC ,317 (75%) thought that there is an existence of structures that affect male  
 165 involvement in ANC while 231 (55%) thought that government/health facility initiatives have an effect on  
 166 male involvement in ANC (Table 2).

167 **Table 2: Relational, institutional and societal characteristics of male partners**

| Variable                                                                      | Frequency, n (%) |
|-------------------------------------------------------------------------------|------------------|
| <b>Relational characteristics</b>                                             |                  |
| <b>Had frequent discussions on ANC during most recent pregnancy (n=423)</b>   |                  |
| Yes                                                                           | 231 (55)         |
| No                                                                            | 192 (45)         |
| <b>Lived with partner during most recent pregnancy (n=423)</b>                |                  |
| Yes                                                                           | 289 (68)         |
| No                                                                            | 134 (32)         |
| <b>Lived with other family members during most recent pregnancy(n=423)</b>    |                  |
| Yes                                                                           | 256 (61)         |
| No                                                                            | 167 (39)         |
| <b>Whether family members influenced partner’s involvement in ANC (n=256)</b> |                  |
| Yes                                                                           | 154 (60 )        |
| No                                                                            | 102 (40)         |
| <b>Nature of influence of family members(n=154)</b>                           |                  |
| Positive                                                                      | 25 (16)          |
| Negative                                                                      | 129 (84)         |
| <b>Whether peer influence affects male involvement in ANC (423)</b>           |                  |
| Yes                                                                           | 234 (55)         |
| No                                                                            | 189 (45)         |
| <b>Nature of peer influence (234)</b>                                         |                  |
| Positive                                                                      | 51 (22)          |
| Negative                                                                      | 183 (78)         |
| <b>Institutional characteristics</b>                                          |                  |
| <b>Whether health facilities promote male involvement (n=423)</b>             |                  |
| Yes                                                                           | 383 (91)         |
| No                                                                            | 40 (9)           |
| <b>Whether lack of male health workers affects male involvement (n=423)</b>   |                  |
| Yes                                                                           | 7 (2)            |
| No                                                                            | 416 (98)         |
| <b>Whether lack of privacy affects male involvement in ANC (n=423)</b>        |                  |
| Yes                                                                           | 31 (7)           |

|                                                                                                                         |          |
|-------------------------------------------------------------------------------------------------------------------------|----------|
| No                                                                                                                      | 392 (93) |
| <b>Whether long waiting hour affects male involvement in ANC (n=423)</b>                                                |          |
| Yes                                                                                                                     | 315 (74) |
| No                                                                                                                      | 108 (26) |
| <b>Whether fear of HIV test affects male involvement in ANC (n=423)</b>                                                 |          |
| Yes                                                                                                                     | 217 (51) |
| No                                                                                                                      | 206 (49) |
| <b>Whether health worker's attitude affects male involvement in ANC (n=423)</b>                                         |          |
| Yes                                                                                                                     | 56 (13)  |
| No                                                                                                                      | 367 (87) |
| <b>Distance from partner's home affects male involvement in ANC (n=423)</b>                                             |          |
| Less than 3km                                                                                                           | 203 (48) |
| More than 3km                                                                                                           | 220 (52) |
| <b>Societal factors</b>                                                                                                 |          |
| <b>Whether cultural norms affect male involvement in ANC(n=423)</b>                                                     |          |
| Yes                                                                                                                     | 239 (57) |
| No                                                                                                                      | 184 (43) |
| <b>Whether there are structures that promote male involvement in ANC (n=423)</b>                                        |          |
| Yes                                                                                                                     | 317 (75) |
| No                                                                                                                      | 106 (25) |
| <b>Whether there are government/health facility initiatives that affect initiatives male involvement in ANC (n=423)</b> |          |
| Yes                                                                                                                     | 231 (55) |
| No                                                                                                                      | 192 (45) |

168

169 **Bivariate analysis showing relationship between male partner characteristics and involvement in ANC,**

170 **Palabek Refugee Settlement, Uganda, November 2021.**

171 At bivariate analysis, we noted significant differences in male involvement concerning partner's level of  
 172 education (p= 0.001), source of income (p= 0.001), partner's access to ANC information (p= 0.001),  
 173 frequent discussion with female partner (p= 0.001), living with female partner during pregnancy (p=  
 174 0.001), average distance from partner's home to the health facility (p= 0.004) and cultural norms (p=  
 175 0.035) (Table 3).

176

177  
 178 **Table 3: Bivariate analysis of factors associated with male involvement in ANC in Palabek refugee**  
 179 **settlement.**

| Variable                                                                                     | Male involvement |           | X <sup>2</sup> | p-value   |
|----------------------------------------------------------------------------------------------|------------------|-----------|----------------|-----------|
|                                                                                              | Yes, n (%)       | No, n (%) |                |           |
| <b>Individual predictors</b>                                                                 |                  |           |                |           |
| <b>Male partners age</b>                                                                     |                  |           | 5.6            | 0.134     |
| 18-27                                                                                        | 59 (36)          | 106 (64)  |                |           |
| 28-37                                                                                        | 77 (39)          | 121 (61)  |                |           |
| 38-47                                                                                        | 24 (53)          | 21 (47)   |                |           |
| ≥48                                                                                          | 4 (27)           | 11 (73)   |                |           |
| <b>Marital status</b>                                                                        |                  |           | 0.27           | 0.639     |
| Married                                                                                      | 123 (38)         | 200 (62)  |                |           |
| Un married                                                                                   | 41 (41)          | 59 (59)   |                |           |
| <b>Partner's level of education</b>                                                          |                  |           | 11.0           | <0.001*** |
| No formal education                                                                          | 18 (23)          | 62 (77)   |                |           |
| Formal education                                                                             | 146 (43)         | 197 (57)  |                |           |
| <b>Number of children with partner</b>                                                       |                  |           | 2.6            | 0.271     |
| 0-2                                                                                          | 71 (37)          | 123 (63)  |                |           |
| 3-5                                                                                          | 65 (38)          | 106 (62)  |                |           |
| 6 and above                                                                                  | 28 (48)          | 30 (52)   |                |           |
| <b>Source of income</b>                                                                      |                  |           | 16.5           | <0.001*** |
| Yes                                                                                          | 35 (64)          | 20 (36)   |                |           |
| No                                                                                           | 129 (35)         | 239 (65)  |                |           |
| <b>Whether partner accessed ANC information during most recent pregnancy</b>                 |                  |           | 64.7           | <0.001*** |
| Yes                                                                                          | 139(54)          | 118(46)   |                |           |
| No                                                                                           | 25(15)           | 141(85)   |                |           |
| <b>Relational predictors</b>                                                                 |                  |           |                |           |
| <b>Whether there were frequent discussions on ANC</b>                                        |                  |           | 123.5          | <0.001*** |
| Yes                                                                                          | 145 (63)         | 86 (33)   |                |           |
| No                                                                                           | 19 (10)          | 173 (90)  |                |           |
| <b>Whether respondent lives/lived with partner during most recent pregnancy</b>              |                  |           | 16.5           | <0.001*** |
| Yes                                                                                          | 131 (45)         | 158 (55)  |                |           |
| No                                                                                           | 33 (25)          | 101(75)   |                |           |
| <b>Whether respondent lives/lived with other family members during most recent pregnancy</b> |                  |           | 0.003          | 1.000     |
| Yes                                                                                          | 99 (39)          | 157 (61)  |                |           |

|                                                                                                |          |          |      |               |
|------------------------------------------------------------------------------------------------|----------|----------|------|---------------|
| No                                                                                             | 65 (39)  | 102 (61) |      |               |
| <b>Whether peers influence affects male involvement in ANC</b>                                 |          |          | 0.02 | 0.920         |
| Yes                                                                                            | 90 (38)  | 144 (62) |      |               |
| No                                                                                             | 74 (39)  | 115 (61) |      |               |
| <b>Institutional predictors</b>                                                                |          |          |      |               |
| <b>Whether health facilities promote male involvement in ANC</b>                               |          |          | 1.43 | 0.240         |
| Yes                                                                                            | 152 (40) | 231 (60) |      |               |
| No                                                                                             | 12 (30)  | 28 (70)  |      |               |
| <b>Whether absence of male staff affects male involvement in ANC</b>                           |          |          | 0.31 | 0.711         |
| Yes                                                                                            | 2 (29)   | 5 (71)   |      |               |
| No                                                                                             | 162 (39) | 254 (61) |      |               |
| <b>Whether lack of privacy affects male involvement in ANC</b>                                 |          |          | 0.15 | 0.709         |
| Yes                                                                                            | 11 (35)  | 20 (65)  |      |               |
| No                                                                                             | 153 (39) | 239 (61) |      |               |
| <b>Whether long waiting time affects male involvement in ANC</b>                               |          |          | 0.51 | 0.494         |
| Yes                                                                                            | 119 (38) | 196 (62) |      |               |
| No                                                                                             | 45 (42)  | 63 (58)  |      |               |
| <b>Whether fear of HIV test affects male involvement in ANC</b>                                |          |          | 0.15 | 0.842         |
| Yes                                                                                            | 83 (38)  | 134 (62) |      |               |
| No                                                                                             | 81 (39)  | 125 (61) |      |               |
| <b>Whether attitude of health workers affects male involvement in ANC</b>                      |          |          | 1.93 | 0.187         |
| Yes                                                                                            | 17(30)   | 39 (70)  |      |               |
| No                                                                                             | 147(40)  | 220 (60) |      |               |
| <b>Whether distance from partner's home to health facility affects male involvement in ANC</b> |          |          | 8.63 | <b>0.004*</b> |
| Less than 3km                                                                                  | 64(32)   | 139(68)  |      |               |
| More than 3km                                                                                  | 100(45)  | 120(55)  |      |               |
| <b>Societal predictors</b>                                                                     |          |          |      |               |
| <b>Whether cultural norms affect male involvement in ANC</b>                                   |          |          | 4.6  | <b>0.035*</b> |
| Yes                                                                                            | 82(34)   | 157(66)  |      |               |
| No                                                                                             | 82(45)   | 102(55)  |      |               |
| <b>Whether structures that affect male involvement in ANC</b>                                  |          |          | 2.7  | 0.108         |
| Yes                                                                                            | 130 (41) | 187 (59) |      |               |
| No                                                                                             | 34 (32)  | 72 (68)  |      |               |
| <b>Whether there are policy factors/initiatives that affect male involvement in ANC</b>        |          |          | 1.70 | 0.229         |
| Yes                                                                                            | 96 (41)  | 135 (59) |      |               |
| No                                                                                             | 68 (35)  | 124 (65) |      |               |

181

182

183 **Table 4: Multivariate analysis of factors associated with male involvement in ANC in Palabek Refugee**  
 184 **Settlement, Uganda, November 2021.**

185 At multivariate analysis, we noted that access to ANC information by male partners (AOR 3.0; 95%CI: 1.7-  
 186 5.4), having discussions on ANC (AOR 10.1; 95%CI: 5.6-18.0) and living more than 3kms from the health  
 187 facility (AOR 0.037, 95%CI: 0.6-1.0) were significantly associated with male involvement (Table 4).

188 **Table 4: Multivariate analysis of factors associated with male involvement in ANC in Palabek refugee**  
 189 **settlement.**

| Variable                                   | Crude odds ratio (95% CI) | p-value | Adjusted odds ratio (95% CI) | p-value             |
|--------------------------------------------|---------------------------|---------|------------------------------|---------------------|
| <b>Level of education</b>                  |                           |         |                              |                     |
| No formal education                        | 1.0                       |         | 1.0                          |                     |
| Formal education                           | 0.6(0.3-1.3)              | 0.188   | 0.6(0.3-1.3)                 | 0.178               |
| <b>Economic status</b>                     |                           |         |                              |                     |
| Did not have a source of income            | 1.0                       |         | 1.0                          |                     |
| Had a source of income                     | 1.8(0.9-3.5)              | 0.102   | 1.8(0.9-3.6)                 | 0.082               |
| <b>Access to information</b>               |                           |         |                              |                     |
| No                                         | 1.0                       |         | 1.0                          |                     |
| Yes                                        | 3.0(1.7-5.4)              | <0.001  | 3.0 (1.7-5.4)                | <b>0.001***</b>     |
| <b>Discussion on ANC</b>                   |                           |         |                              |                     |
| No                                         | 1.0                       |         | 1.0                          |                     |
| Yes                                        | 9.8(5.5-17.4)             | <0.001  | 10.1 (5.6-18.0)              | <b>&lt;0.001***</b> |
| <b>Living with partner</b>                 |                           |         |                              |                     |
| No                                         | 1.0                       |         | 1.0                          |                     |
| Yes                                        | 1.6 (0.9-2.9)             | 0.102   | 1.6 (0.9-2.9)                | 0.107               |
| <b>Average distance to health facility</b> |                           |         |                              |                     |

|                                                              |               |       |               |               |
|--------------------------------------------------------------|---------------|-------|---------------|---------------|
| Less than 3Km                                                | 1.0           |       | 1.0           |               |
| 3km and above                                                | 0.6 (0.4-1.0) | 0.045 | 0.6 (0.4-1.0) | <b>0.037*</b> |
| <b>Whether cultural norms affect male involvement in ANC</b> |               |       |               |               |
| No                                                           | 1.0           | 1.0   |               |               |
| Yes                                                          | 0.8 (0.5-1.4) | 0.511 | 0.8 (0.5-1.4) | 0.420         |

190 **Key: \*=p-value<0.05, \*\*=p-value<0.01, \*\*\*=p-value<0.001**

191 **Discussion**

192 The study findings indicated that one in three men were involved in ANC. Access to ANC information and  
193 frequent couple discussions on ANC were positively associated with male involvement. On the other hand,  
194 longer distance of  $\geq 3$ km to the health facility had a negative association with male involvement in ANC.

195 The study findings indicated that one in three men were involved in ANC. This is higher than the level of  
196 male involvement stipulated by some studies conducted in different parts of Africa including Uganda &  
197 Zambia(17,21). This difference is probably because in the comparison studies level of male involvement  
198 was measured by a man's attendance of ANC together with partner while in the current study level of  
199 male involvement was measured by a man's participation in six different activities. In this study a man's  
200 participation in at least four of the activities meant that the man was involved while participation in  $\leq 3$  or  
201 less activities meant that the man was not involved in ANC. The study finding also indicated that level of  
202 male involvement in the current study was lower than the level of involvement indicated in other studies  
203 conducted in Tanzania, Ghana, Kenya and India (22–25) .The WHO report on refugee and migrant health  
204 for 2022 (26) supports the above findings. This report indicated that utilization of health services among  
205 refugees is restricted due to social economic, political barriers, cultural difference and institutional  
206 discrimination. It is therefore inevitable that optimal utilization of ANC services which would be improved  
207 by male involvement is also affected by such barriers.

208 The study findings indicated that men who had access to ANC information were three times more likely  
209 to be involved in ANC than their counter parts. In proposition of above finding, the resource package on  
210 engaging men during pregnancy and child birth UNFPA, UN women and European Union (27) suggests  
211 that health education for men is very important in improving male involvement in ANC. These study  
212 findings are also similar to findings of different studies conducted in Africa including Dodoma region of  
213 central Tanzania and Ambo town, Ethiopia (22,28) where male involvement was higher among men who

214 have access to information. The men who have access to information are more likely to be involved in  
215 ANC probably because access to information leads to improved level knowledge on the importance of  
216 their involvement. It is important that a number of awareness creation interventions such as use of  
217 Information Education and communication (IEC) materials, modeling through peers, mass media and use  
218 of theatre as a tool for health promotion should be implemented.

219 This study finding indicated that slightly above half of male partners engaged in frequent communication  
220 on ANC during their partners' most recent pregnancy. The study findings also indicated that female  
221 partners who reported that they had frequent discussions on ANC with their spouses were up to 10.1  
222 times more likely to have their partners involved in ANC than their counter parts who reported that they  
223 did not have such discussions. This is probably because when couples communicate on matters  
224 concerning ANC, they are likely to learn the needs of the expectant partners and also agree on how the  
225 male partner can support during this period. These findings are in agreement with the findings conducted  
226 in Kyela district, Mbeya Tanzania and Dodoma region of Tanzania where partners who had frequent  
227 discussion were likely to realized higher odds of male involvement in ANC(3,22).

228 The study findings indicated that approximately half of male partners lived at a distance of less than 3km  
229 from the nearest health facility. The study findings further indicated that the men who lived more than  
230 3km from the nearest health facility were 0.4 times less likely to get involved in ANC than their counter  
231 parts who lived less than 3km to the nearest health facility. UNICEF in its community based program for  
232 bringing critical services to the world's hardest-to-reach children and mothers suggested that one of the  
233 greatest barriers for service utilization is the distance to the health facilities (29) .This barrier definitely  
234 affects male involvement in ANC like it affects access to other health services. These findings are similarly  
235 to the study findings for a study conducted in Sekondi region of Ghana(14).The men who live closer to  
236 the health facilities are more likely to be involved in ANC probably because they are less likely to incur



237 transport cost as a couple to reach the health facilities. Such men are also likely to spend a shorter time  
238 getting to the health facilities and can receive services earlier then go back for their other businesses  
239 unlike their counter parts. The study findings are however contrary to findings of a Study conducted in  
240 South Ethiopia (30) which suggested that that women who walked less than 5 km distance to the nearest  
241 health facility had lower odds of having their partners involved in ANC than their counterparts who walked  
242 more than 5 km. It is important to accelerate strategies such as conducting regular integrated outreaches  
243 to ensure that services are taken closer to the community members which would in turn lead to increased  
244 male involvement in ANC.

#### 245 **Strengths and limitations of the study**

246 Our study had some strengths. We undertook a holistic approach using six variables to assess the level of  
247 male involvement. This makes it different from other studies that majorly employed one variable  
248 (accompanying partner for ANC clinics) to measure the level of male involvement. Secondly, we used  
249 constructs of the Social Ecological Model to develop our questionnaire. The use of such a standardized  
250 tool ensures validity, reliability and objectivity of our study findings. This was the first study on male  
251 involvement in ANC to be conducted in a refugee setting in Uganda. It therefore provides an opportunity  
252 for generalization of findings to similar refugee communities.

253 Our study also had some limitations. First our study was conducted in the refugee settlement where  
254 movement is restricted so it may be difficult to generalize findings for the stable communities since these  
255 contexts are completely different. Furthermore, we ascertained determinants of male involvement in the  
256 most recent pregnancy. The level of involvement for earlier pregnancies could have been different with  
257 different influencing factors.

258

## 259 **Conclusion and recommendations**

260 The study findings indicated that one in every three men at Palabek refugee settlement were involved in  
261 ANC. Two factors that is access to information on ANC and frequent couple communication were found  
262 to be positively associated with level of male involvement. On the other hand, distance (> 3km) to the  
263 health facility had was negatively association with male involvement in ANC.

264 We therefore recommend that the government and UNHCR should accelerate community sensitization  
265 on the importance of male involvement and the role of male partners during pregnancy.

266 The government of Uganda and UNCHR should emphasize implementation of the modeling approach  
267 where men with high involvement index are modeled to become change agents.

268 Acceleration of strategies such as regular integrated outreaches would ensure that services are taken  
269 closer to the community members. This would in turn lead to increased male involvement in ANC.

270 Finally, we recommend that a qualitative study should be conducted to assess in-depth community views  
271 and insights on determinants of male involvement in ANC and ways of bridging identified gaps.

## 272 **List of abbreviations**

273 ANC, Antenatal care

274 AOR, Adjusted odds ratio

275 EU, European Union

276 IEC, Information Education and communication

277 Km, Kilometer

278 MCTC, Mother -to -child transmission of HIV

279 OPM, Office of the Prime Minister

280 SPSS, Statistical Package for Social Sciences

- 281 UNFPA, United Nations Population Fund
- 282 UNHCR, United Nations High Commission for Refugees
- 283 UNICEF, United Nations Children’s Fund
- 284 UN women, United Nations Women
- 285 WHO, World Health Organization
- 286
- 287
- 288
- 289
- 290 OP@laabekian
- 291 <https://orcid.org/0000-0001-8451-2609>

292 **Declarations**

293 **Ethics approval and consent to participate**

294 All the protocols for this project were reviewed and approved by Clarke International University (CIU)  
295 Research Ethical Committee No.1.0, 2021-10-05 in accordance with the Declaration of Helsinki and CIU  
296 research guild lines. Permission to collect data from the settlement was sought from office of the Prime  
297 Minister (Palabek refugee desk). We also sought verbal informed consent in the local language from the  
298 participants as we had used phone interviews and the verbal informed consent procedure was the most  
299 suitable. They were informed that their participation was voluntary, and their refusal would not result in  
300 any negative consequences. To protect the confidentiality of the respondents, each was assigned a unique  
301 identifier that was used instead of their names. All methods were carried out in accordance with relevant  
302 guidelines and regulations.

303 **Consent for publication**

304 Not applicable

305 **Availability of data and materials**

306 The datasets used and/or analyzed during the current study are available from the corresponding author  
307 on reasonable request. The data set and questionnaires used and/or analyzed during the current study  
308 are available on Mendeley repository .

309 **Competing interests**

310 All authors declared that they have no competing interests.

311 **Funding**

312 The study did not receive funding from any source.

313 **Authors' contributions**

314 IA did the conceptualization of the study idea, data analysis, writing, and editing of the manuscript. DN,  
315 SO, JBA and AK were involved in the conceptualization of the study idea. AK and JBA guided the writing

316 and reviewing of the manuscript and were involved in the conceptualization of the study idea, writing,  
317 editing, and reviewing of the manuscript. All authors read and approved the final manuscript.

318 **Acknowledgements**

319 We thank the respondents for their participation in the study. We also thank the Office of the Prime  
320 Minister (OPM) Palabek Refugee Desk for the administrative clearance provided before conducting this  
321 study. Finally, we thank the research assistants for doing data collection.

322 **References**

- 323 1. Gopal P, Fisher D, Seruwagi G, Taddese HB. Male involvement in reproductive, maternal, newborn, and  
324 child health: evaluating gaps between policy and practice in Uganda. *Reprod Health*. 2020  
325 Dec;17(1):114.
- 326 2. Falade-Fatila O, Adebayo AM. Male partners' involvement in pregnancy related care among married  
327 men in Ibadan, Nigeria. *Reprod Health*. 2020 Dec;17(1):14.
- 328 3. Kabanga E, Chibwae A, Basinda N, Morona D. Prevalence of male partner's involvement in antenatal  
329 care visits – in Kyela district, Mbeya. *BMC Pregnancy Childbirth*. 2019 Dec;19(1):321.
- 330 4. Cheng ER, Rifas-Shiman SL, Perkins ME, Rich-Edwards JW, Gillman MW, Wright R, et al. The Influence  
331 of Antenatal Partner Support on Pregnancy Outcomes. *Journal of Women's Health*. 2016 Jul;25(7):672–  
332 9.
- 333 5. Jennings L, Na M, Michelle H. Women's empowerment and male involvement in antenatal care:  
334 analyses of Demographic and Health Surveys (DHS) in selected African countries. 2014.
- 335 6. Tokhi M, Comrie-Thomson L, Davis J, Portela A, Chersich M, Luchters S. Involving men to improve  
336 maternal and newborn health: A systematic review of the effectiveness of interventions. van Wouwe  
337 JP, editor. *PLoS ONE*. 2018 Jan 25;13(1):e0191620.
- 338 7. Mohammed BH, Johnston JM, Vackova D, Hassen SM, Yi H. The role of male partner in utilization of  
339 maternal health care services in Ethiopia: a community-based couple study. *BMC Pregnancy Childbirth*.  
340 2019 Dec;19(1):28.
- 341 8. Odeny B, McGrath CJ, Langat A, Pintye J, Singa B, Kinuthia J, et al. Male partner antenatal clinic  
342 attendance is associated with increased uptake of maternal health services and infant BCG  
343 immunization: a national survey in Kenya. *BMC Pregnancy Childbirth*. 2019 Dec;19(1):284.
- 344 9. Alemayehu M, Gebrehiwot TG, Medhanyie AA, Desta A, Alemu T, Abrha A, et al. Utilization and factors  
345 associated with antenatal, delivery and postnatal Care Services in Tigray Region, Ethiopia: a  
346 community-based cross-sectional study. *BMC Pregnancy Childbirth*. 2020 Dec;20(1):334.
- 347 10. Assaf S, Lwendo MD. Does men's involvement improve the Health outcomes of their Partners and  
348 children? 2018;

- 349 11. Mekonnen C kassa, Abate HK, Demessie NG. Male involvement in birth preparedness and  
350 complication readiness in Ethiopia: A Systematic review and Meta-analysis [Internet]. In Review; 2020  
351 Sep [cited 2023 Feb 13]. Available from: <https://www.researchsquare.com/article/rs-55935/v2>
- 352 12. Muheirwe F, Nuhu S. Men’s participation in maternal and child health care in Western Uganda:  
353 perspectives from the community. BMC Public Health. 2019 Dec;19(1):1048.
- 354 13. Lyatuu GW, Naburi H, Urrio R, Mwashemele SZ, Mdingi S, Panga R, et al. Engaging community  
355 leaders to improve male partner participation in the prevention of mother-to-child transmission of HIV  
356 in Dar es Salaam, Tanzania. Yotebieng M, editor. PLoS ONE. 2018 Dec 12;13(12):e0207986.
- 357 14. Annoon Y, Hormenu T, Ahinkorah BO, Seidu AA, Ameyaw EK, Sambah F. Perception of pregnant  
358 women on barriers to male involvement in antenatal care in Sekondi, Ghana. Heliyon. 2020  
359 Jul;6(7):e04434.
- 360 15. Suandi D, Williams P, Bhattacharya S. Does involving male partners in antenatal care improve  
361 healthcare utilisation? Systematic review and meta-analysis of the published literature from low- and  
362 middle-income countries. International Health. 2020 Sep 1;12(5):484–98.
- 363 16. Nasuna Zahara, Nuwahereza Innocent. FACTORS INFLUENCING MALE PARTICIPATION IN  
364 ANTENATAL CARE AT UGANDA MARTYRS’ HOSPITAL -IBANDA DISTRICT. 2018 [cited 2023 Feb 13];  
365 Available from: <http://rgdoi.net/10.13140/RG.2.2.13036.39047>
- 366 17. Kariuki K, Seruwagi G. Determinants of Male Partner Involvement in Antenatal Care in Wakiso  
367 District, Uganda. BJMMR. 2016 Jan 10;18(7):1–15.
- 368 18. Lamwo district. Lamwo District Health System Information Report. 2020;
- 369 19. UNHCR. Uganda - Refugee Statistics October 2021 - Palabek. 2021;
- 370 20. Byamugisha R, Tusime J, Nulu S, Tylleskär T. Determinants of male involvement in the prevention  
371 of mother-child transmission of HIV programme in Eastern Uganda: a cross-sectional survey.  
372 Reproductive Health 2010, 7:12. :2010.

- 373 21. Muloongo H, Sitali D, Zulu JM, Hazemba AN, Mweemba O. Men's perspectives on male  
374 participation in antenatal care with their pregnant wives: a case of a military hospital in Lusaka, Zambia.  
375 BMC Health Serv Res. 2019 Dec;19(1):463.
- 376 22. Gibore NS, Bali TAL, Kibusi SM. Factors influencing men's involvement in antenatal care services:  
377 a cross-sectional study in a low resource setting, Central Tanzania. Reprod Health. 2019 Dec;16(1):52.
- 378 23. Kumbeni MT, Assibi Ziba F, Ndebugri Alem J, Apana Nborah S. Factors Influencing Male  
379 Involvement in Antenatal Care in the Kassena Nankana Municipal in the Upper East Region, Ghana. ESJ  
380 [Internet]. 2019 Jul 31 [cited 2023 Feb 13];15(21). Available from:  
381 <http://eujournal.org/index.php/esj/article/view/12235/11799>
- 382 24. Ongolly FK, Bukachi SA. Barriers to men's involvement in antenatal and postnatal care in Butula,  
383 western Kenya. Afr j prim health care fam med [Internet]. 2019 Jul 15 [cited 2023 Feb 13];11(1).  
384 Available from: <https://phcfm.org/index.php/phcfm/article/view/1911>
- 385 25. Suryawanshi D, Rajaseharan D, Venugopal R. Involvement of husband in maternal and child health  
386 care in rural field practice area of a tertiary medical college in South India—A mixed method study. J  
387 Family Med Prim Care. 2021;10(8):2829.
- 388 26. WHO. World report on the health of refugees and migrants. 2022;
- 389 27. UNICEF, EUROPEAN UNION, UNFPA, UN WOMEN. RESOURCE PACKAGE ON ENGAGING. 202AD;
- 390 28. Demissie Bayissa D, Abdissa G. Involvement of Male in Antenatal Care, Birth Preparedness and  
391 Complication Readiness and Associated Factors in Ambo Town, Ethiopia. 2016;2016.
- 392 29. UNICEF. Community health programmes bring critical services to the world's hardest-to-reach  
393 children and mothers.
- 394 30. Paulos K, Awoke N, Mekonnen B, Arba A. Male involvement in birth preparedness and  
395 complication readiness for emergency referral at Sodo town of Wolaita zone, South Ethiopia: a cross  
396 sectional study. BMC Pregnancy Childbirth. 2020 Dec;20(1):62.
- 397
